# Supplementary material for: Modulating the Fe spin state in FeNC catalysts by Ru nanoparticles to facilitate the oxygen reduction reaction
Source: Royal Society of Chemistry journal article supplement (doi:10.1039/d4qm00282b), 2024-01-01
Supplement: d4qm00282b1.pdf [file d4qm00282b1.pdf]

## Supporting Information

### **Modulating Fe spin state in FeNC catalysts by Ru nanoparticles to facilitate oxygen reduction reaction**

*Jinfu Hou, Yongqi Jian, Chengjie Chen, Dengke Zhang, Nan Wang\*, Xiang Yu\* and Hui Meng\**

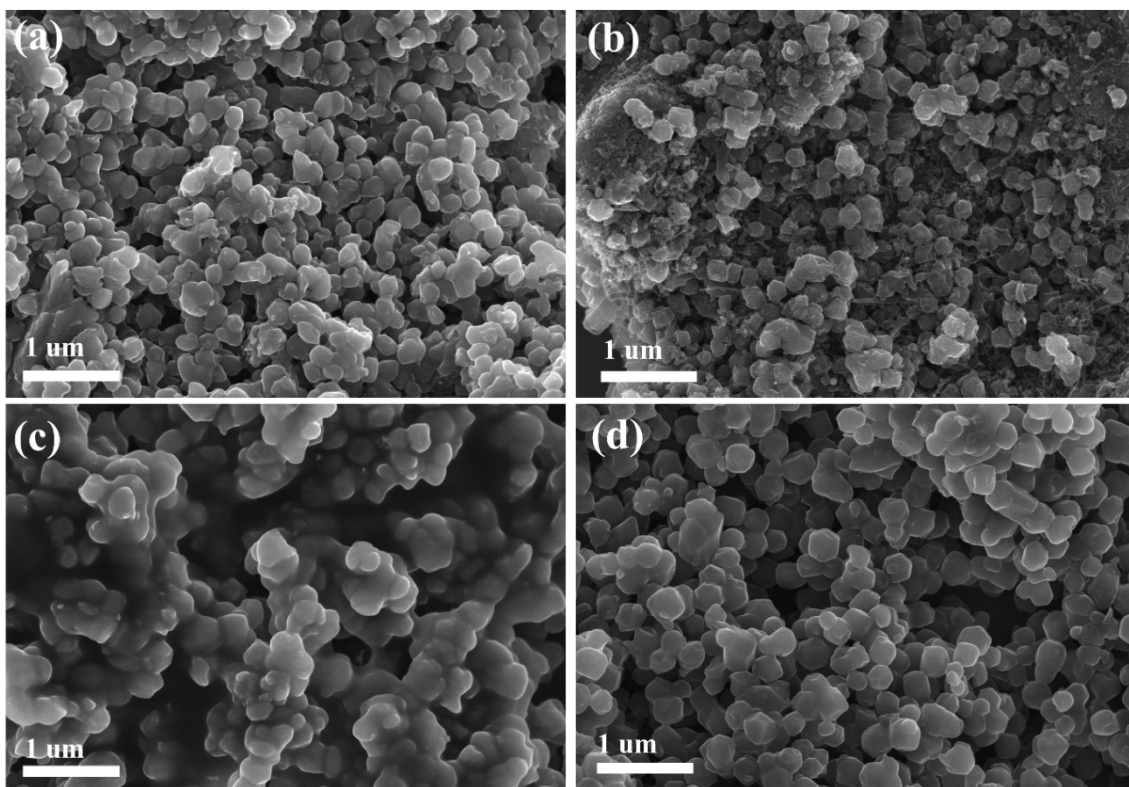

**Figure S1.** SEM images of (a) Ru<sub>NP</sub>@FeNC, (b) FeNC, (c) Ru<sub>NP</sub>@NC, (d) NC.

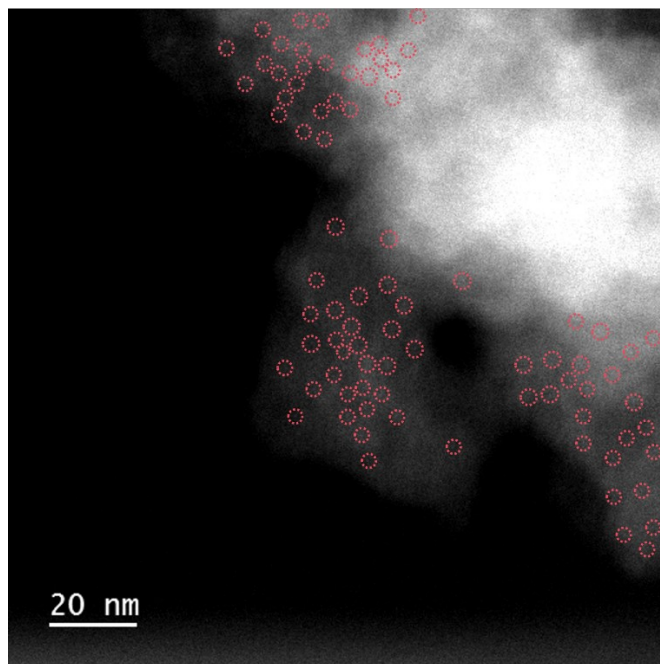

**Figure S2.** HAADF-STEM of Fe-N-C.

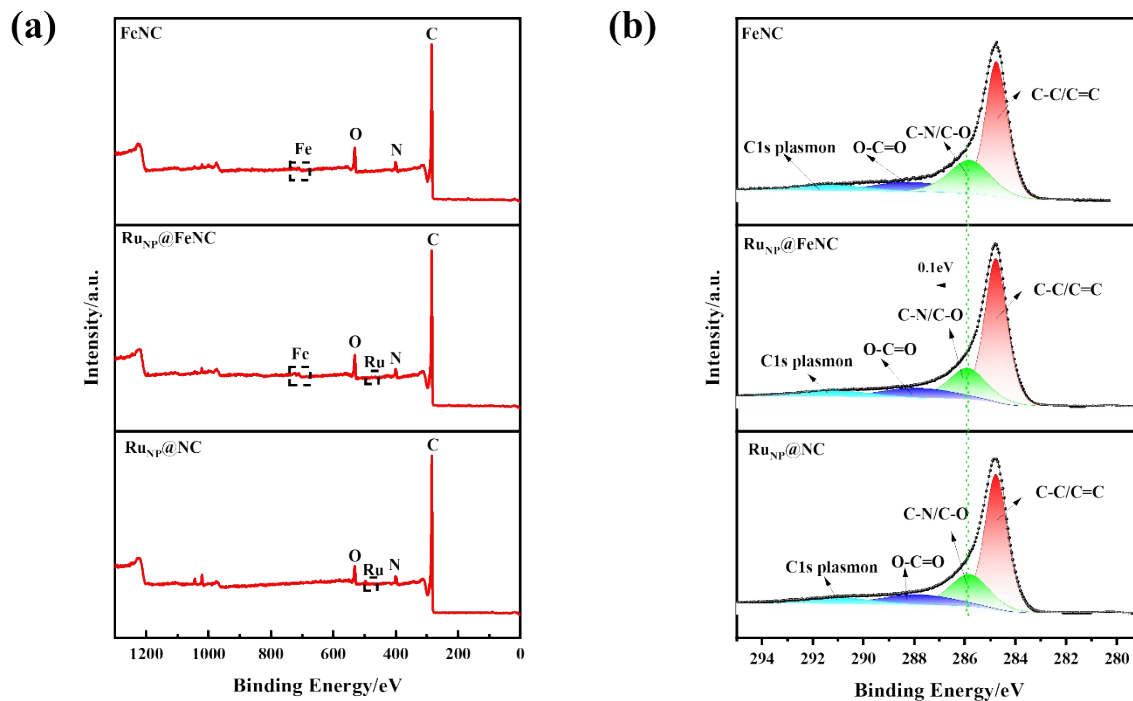

**Figure S3.** (a) XPS survey spectra and (b) C 1s spectra of Ru<sub>NP</sub>@FeNC, FeNC, Ru<sub>NP</sub>@NC.

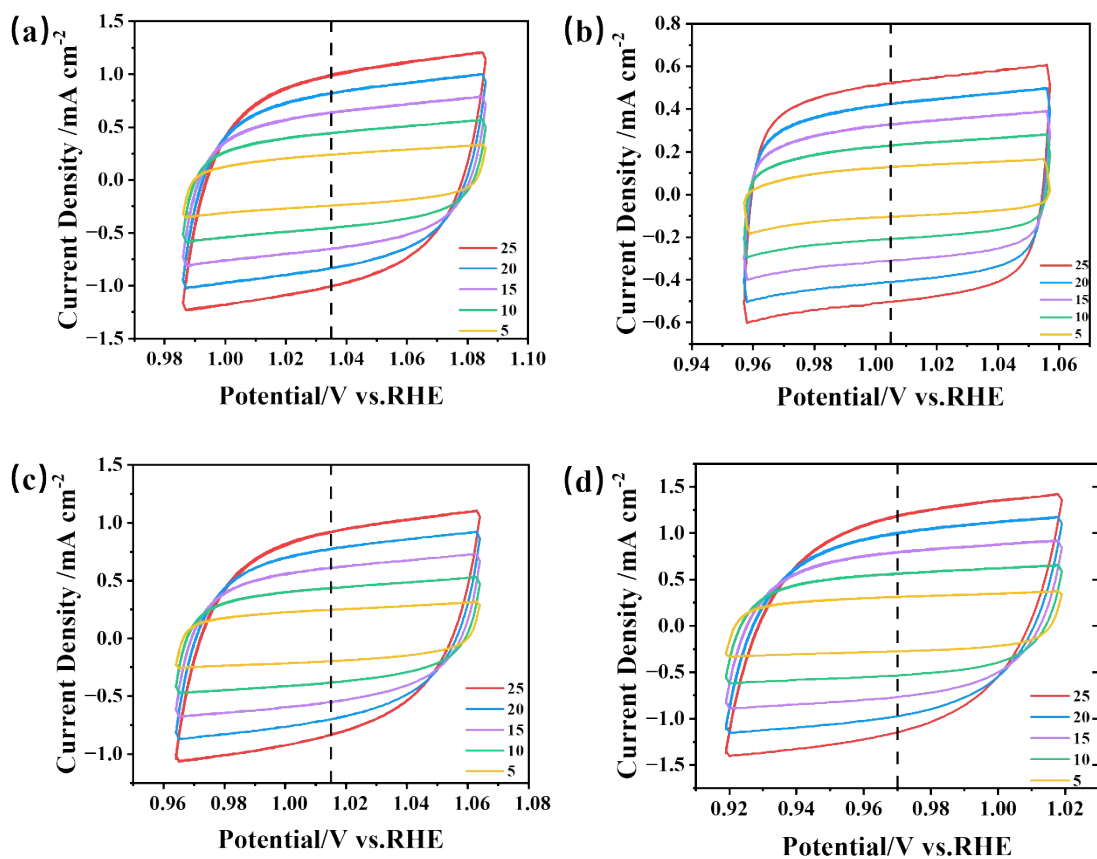

**Figure S4.** ECSA of (a) Ru<sub>NP</sub>@FeNC, (b) FeNC, (c) Ru<sub>NP</sub>@NC, (d) NC.

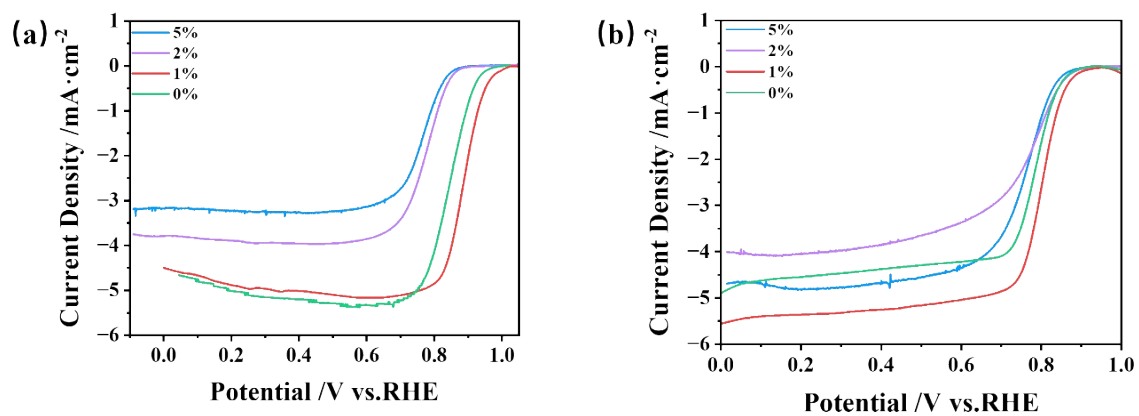

**Figure S5.** Polarization curves in O<sub>2</sub>-saturated 0.1 M KOH(a) and 0.1 M HClO<sub>4</sub> (b) solution at 1600 rpm.

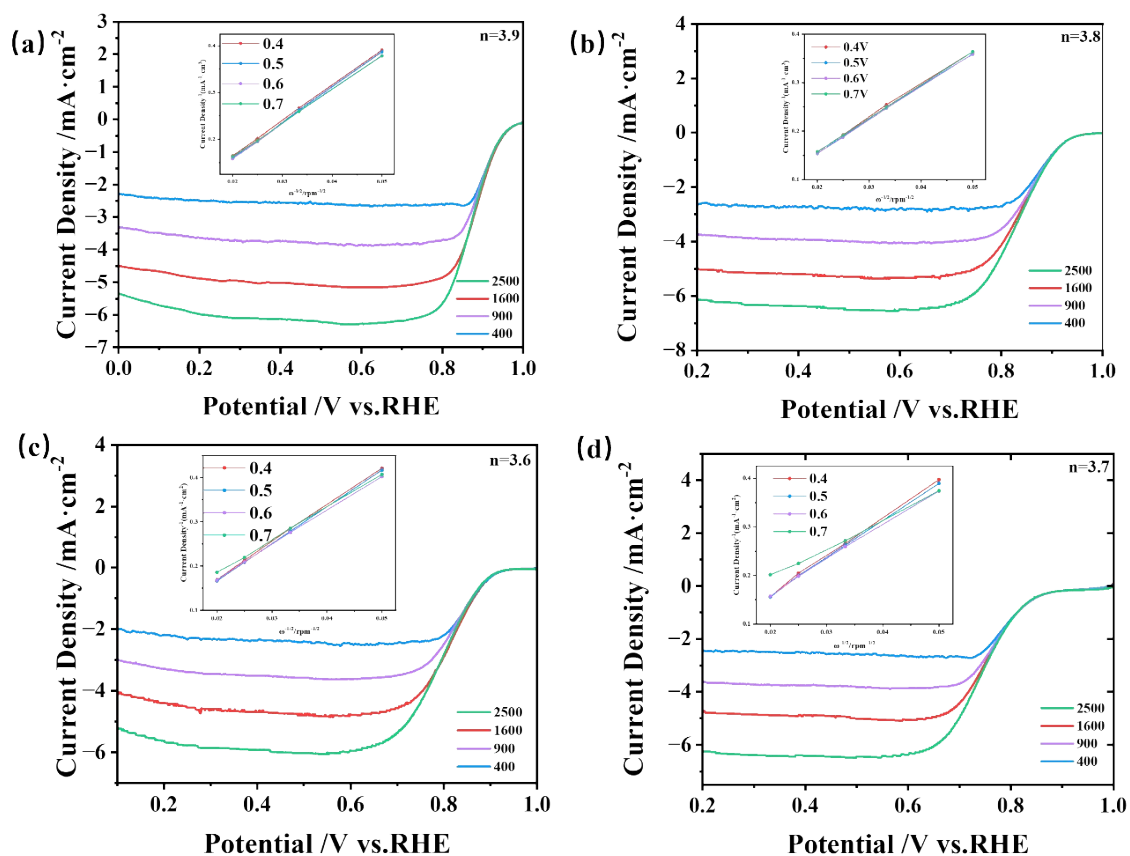

**Figure S6.** LSV in  $\text{O}_2$ -saturated 0.1 M KOH and K-L curves of (a)  $\text{Ru}_{\text{NP}}@\text{FeNC}$ , (b) FeNC, (c)  $\text{Ru}_{\text{NP}}@\text{NC}$ , (d) NC.

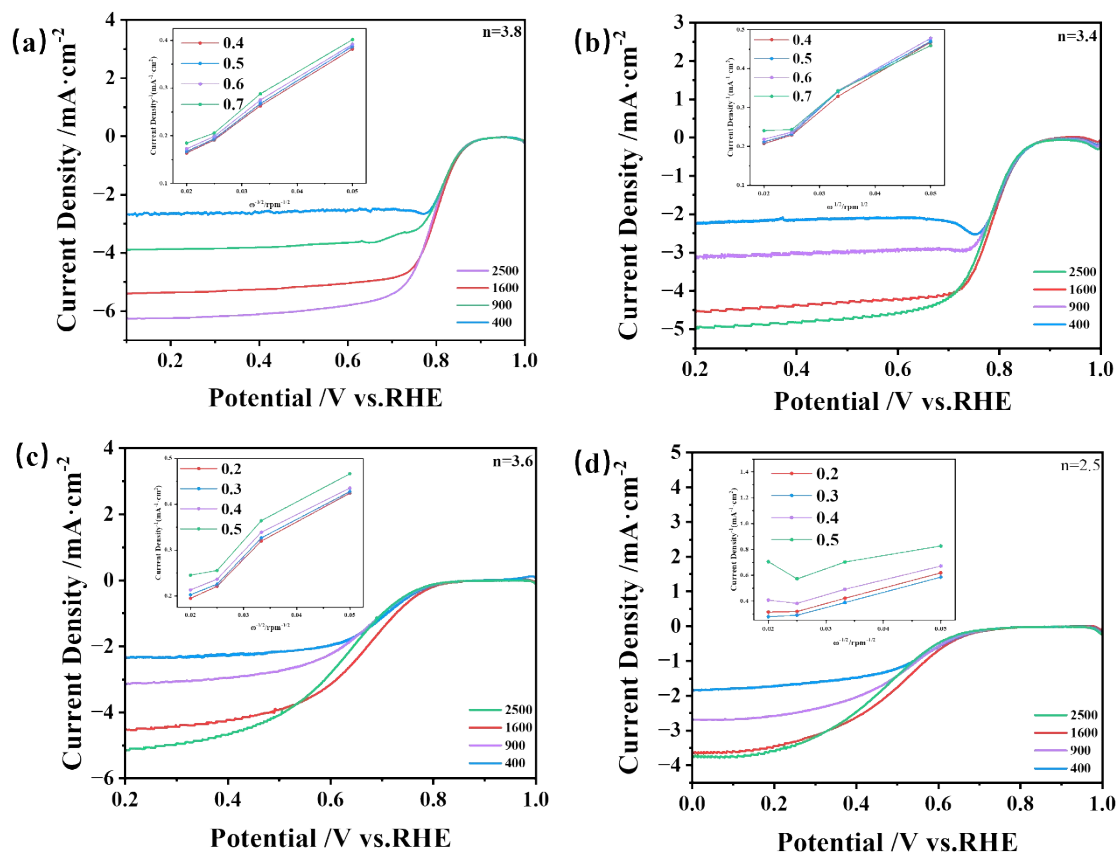

**Figure S7.** LSV in  $O_2$ -saturated  $0.1\text{ M HClO}_4$  and K-L curves of (a)  $\text{Ru}_{\text{NP}}@\text{FeNC}$ , (b)  $\text{FeNC}$ , (c)  $\text{Ru}_{\text{NP}}@\text{NC}$ , (d)  $\text{NC}$ .



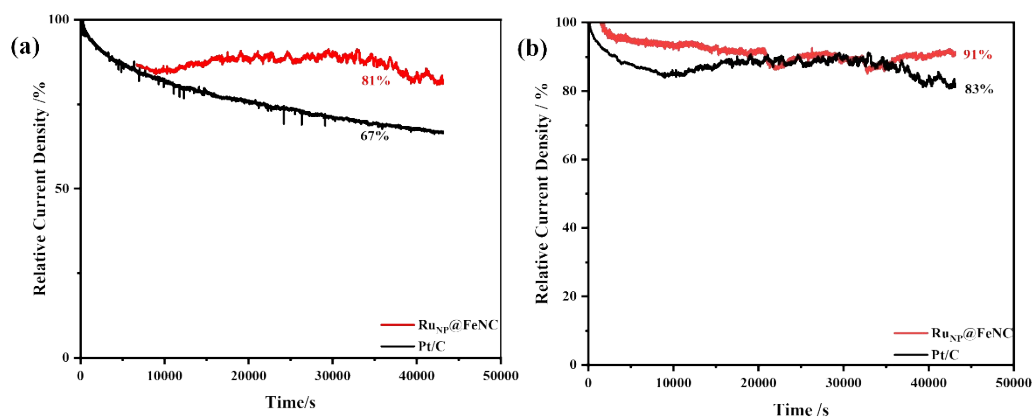

**Figure S8.** Chronoamperometric curves of Pt/C, Ru<sub>NP</sub>@FeNC at a rotation rate of 900 rpm in O<sub>2</sub>-saturated 0.1 M HClO<sub>4</sub> (a) and 0.1 M KOH (b) at 0.70 V for 50,000 s.

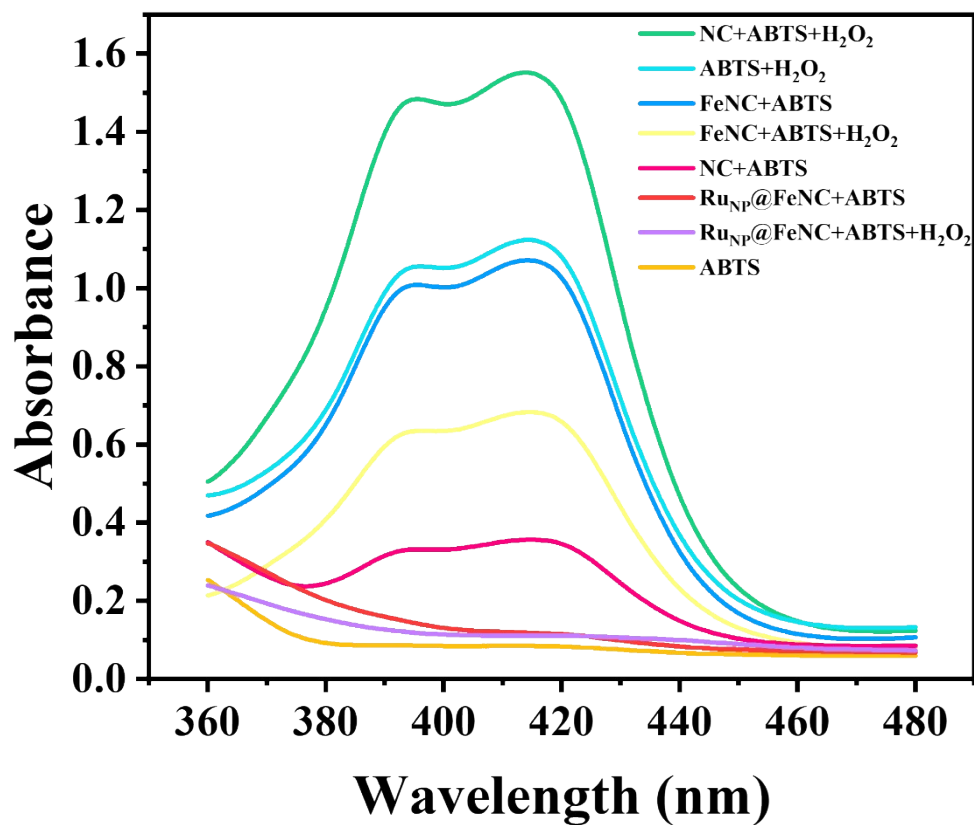

Figure S9. UV-vis spectra obtained by ABTS radicals capture test.

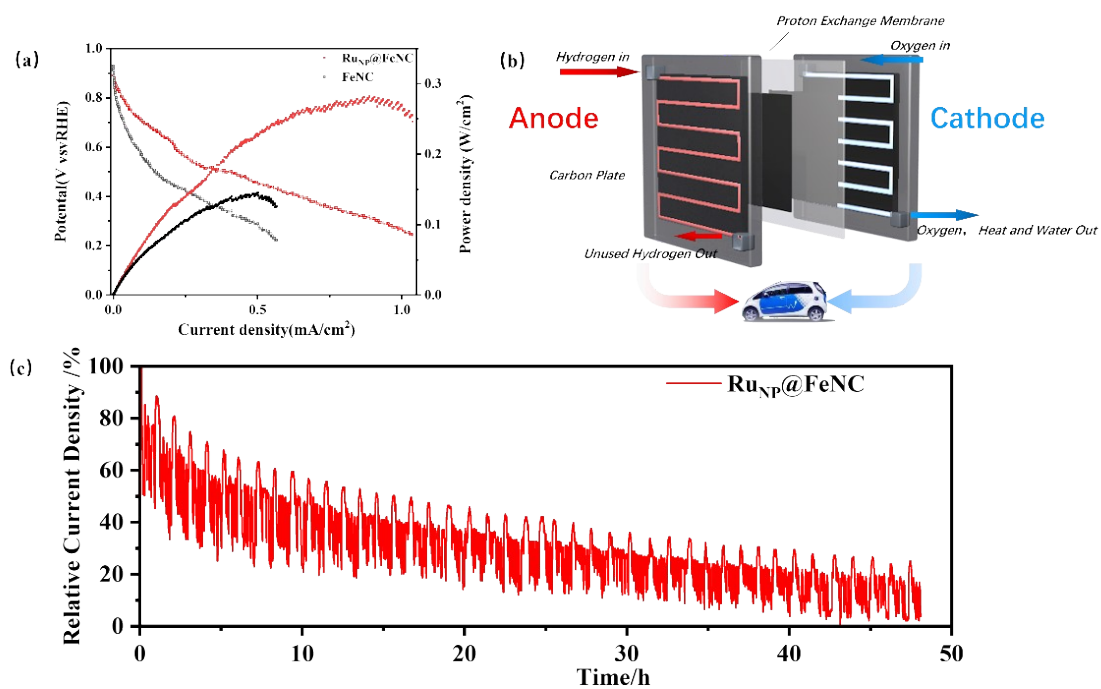

**Figure S10.** (a) The polarization curves and power density of Ru<sub>NP</sub>@FeNC. (b) The mode of Proton exchange membrane fuel cell. (c) Stability test of H<sub>2</sub>-O<sub>2</sub> fuel cell at a constant voltage of 0.6 V with Ru<sub>NP</sub>@FeNC as cathode catalyst.

**Table S1.**  $I_D/I_G$  of different ratios of precursors.

---

| <b>Sample</b>               | <b><math>I_D/I_G</math></b> |
|-----------------------------|-----------------------------|
| <b>Ru<sub>NP</sub>@FeNC</b> | <b>1.21</b>                 |
| <b>FeNC</b>                 | <b>1.21</b>                 |
| <b>Ru<sub>NP</sub>@NC</b>   | <b>1.30</b>                 |
| <b>NC</b>                   | <b>1.24</b>                 |

---

**Table S2.** Specific surface area of catalyst.

| <b>Sample</b>               | <b>BET (m<sup>2</sup>/g)</b> | <b>BJH (m<sup>2</sup>/g)</b> | <b>Dr (m<sup>2</sup>/g)</b> | <b>Pore volume (cc/g)</b> | <b>Average half aperture (nm)</b> |
|-----------------------------|------------------------------|------------------------------|-----------------------------|---------------------------|-----------------------------------|
| <b>Ru<sub>NP</sub>@FeNC</b> | <b>1204.3185</b>             | <b>81.1116</b>               | <b>1311.5038</b>            | <b>0.716794</b>           | <b>1.19</b>                       |
| <b>FeNC</b>                 | <b>915.4467</b>              | <b>142.9801</b>              | <b>945.4902</b>             | <b>0.821949</b>           | <b>1.8</b>                        |
| <b>Ru<sub>NP</sub>@NC</b>   | <b>1032.7341</b>             | <b>48.1433</b>               | <b>1053.9542</b>            | <b>0.591569</b>           | <b>1.15</b>                       |
| <b>NC</b>                   | <b>1913.7137</b>             | <b>81.4465</b>               | <b>2029.3197</b>            | <b>1.127365</b>           | <b>1.18</b>                       |

**Table S3.** XPS and peak calculation results of catalyst.

| <b>Sample</b><br><b>(Atomic %)</b> | <b>Ru<sub>NP</sub>@FeNC</b> | <b>FeNC</b>  | <b>Ru<sub>NP</sub>@NC</b> | <b>NC</b>    |
|------------------------------------|-----------------------------|--------------|---------------------------|--------------|
| <b>Carbon</b>                      | <b>89.11</b>                | <b>88.59</b> | <b>90.25</b>              | <b>87.81</b> |
| <b>Nitrogen</b>                    | <b>3.71</b>                 | <b>3.91</b>  | <b>4.28</b>               | <b>4.22</b>  |
| <b>Oxygen</b>                      | <b>5.90</b>                 | <b>6.27</b>  | <b>4.93</b>               | <b>7.35</b>  |
| <b>Iron</b>                        | <b>0.36</b>                 | <b>0.24</b>  | <b>-</b>                  | <b>0</b>     |
| <b>Ruthenium</b>                   | <b>0.02</b>                 | <b>0</b>     | <b>0.03</b>               | <b>0</b>     |

**Table S4.** Binding energy (eV) of N species in the sample series from XPS measurements.

---

|                  | <b>Ru<sub>NP</sub>@FeNC</b> | <b>FeNC</b>  |
|------------------|-----------------------------|--------------|
| <b>Carbon</b>    | <b>90.25</b>                | <b>87.81</b> |
| <b>Nitrogen</b>  | <b>4.28</b>                 | <b>4.22</b>  |
| <b>Oxygen</b>    | <b>4.93</b>                 | <b>7.35</b>  |
| <b>Iron</b>      | <b>-</b>                    | <b>0</b>     |
| <b>Ruthenium</b> | <b>0.03</b>                 | <b>0</b>     |

---

**Table S5.** Fe 2p<sub>3/2</sub> and binding energy (eV) of the sample series.

---

|                                          | <b>Ru<sub>NP</sub>@FeNC</b> | <b>FeNC</b>   |
|------------------------------------------|-----------------------------|---------------|
| <b>Fe-N<sub>x</sub> 2p<sub>3/2</sub></b> | <b>708.19</b>               | <b>709.44</b> |
| <b>Fe<sup>2+</sup> 2p<sub>3/2</sub></b>  | <b>709.99</b>               | <b>710.73</b> |
| <b>Fe<sup>3+</sup> 2p<sub>3/2</sub></b>  | <b>711.72</b>               | <b>711.92</b> |
| <b>Fe<sup>2+</sup> shake-up</b>          | <b>714.49</b>               | <b>714.61</b> |
| <b>Fe<sup>3+</sup> shake-up</b>          | <b>716.99</b>               | <b>719.52</b> |

---
